# Supplementary material for: Coccomyxagreatwallensis sp. nov. (Trebouxiophyceae, Chlorophyta), a lichen epiphytic alga from Fildes Peninsula, Antarctica
Source: PhytoKeys. 2018 Nov 2;(110):39–50. doi: 10.3897/phytokeys.110.26961 (PMC6236199; doi:10.3897/phytokeys.110.26961)
Supplement: Supplementary material 1 — Table S1. Pairwise distance calculated using ITS rDNA sequences [file phytokeys-110-039-s001.xls]

## Sheet: Distance Data ITS
	d	S.E.
Overall mean distance	0.171	0.015
Pariwise distance	Hemichloris_antarctica_HG972970	Elliptochloris_bilobata_HG972969	Coccomyxa_solorinae_HG972987	Coccomyxa_solorinae_HG972988	Coccomyxa_elongata_HG972980	Coccomyxa_elongata_HG972981	Coccomyxa_simplex_HE586504	Coccomyxa_simplex_HG972989	Coccomyxa_melkonianii_KU696488	Coccomyxa_sp._FN298927_Clade_C	Coccomyxa_sp._AB917140_Clade_D	Coccomyxa_subellipsoidea_HG972974	Coccomyxa_sp._Clade_H	Coccomyxa_sp._Clade_E	Coccomyxa_subellipsoidea_HG972975	Coccomyxa_subellipsoidea_HG972976	Coccomyxa_vinatzeri_HG972994	Coccomyxa_galuniae_HG972996	Coccomyxa_galuniae_FN298928	Coccomyxa_sp._HE586550_Clade_I	Coccomyxa_sp._HE586515_Clade_I	Coccomyxa_onubensis_HE617183	Coccomyxa_polymorpha_HG972979	Coccomyxa_polymorpha_HE586514	Coccomyxa_antinabiotis_FR850476	Coccomyxa_antinabiotis_HE586516	Coccomyxa_viridis_HG973001	Coccomyxa_viridis_HG973002	Coccomyxa_sp._HG973004_Clade_N	Coccomyxa_sp._HG973007_Clade_N	Coccomyxa_dispar_HG972998	Coccomyxa_HE586508_Clade_KL	Coccomyxa_sp._HE586519_Clade_M	Coccomyxa_antarctica_MF465900	Coccomyxa_greatwallensis_sp._nov._FACHB_2139	Coccomyxa_avernensis_HG973000
Hemichloris_antarctica_HG972970		0.019	0.031	0.032	0.031	0.031	0.032	0.031	0.032	0.033	0.031	0.033	0.032	0.034	0.034	0.033	0.033	0.032	0.032	0.033	0.033	0.033	0.032	0.032	0.034	0.034	0.034	0.034	0.033	0.033	0.034	0.035	0.034	0.032	0.034	0.034
Elliptochloris_bilobata_HG972969	0.114		0.033	0.033	0.032	0.032	0.034	0.033	0.034	0.034	0.033	0.034	0.033	0.035	0.035	0.034	0.035	0.034	0.034	0.035	0.035	0.035	0.034	0.034	0.036	0.036	0.035	0.036	0.035	0.035	0.04	0.037	0.036	0.035	0.036	0.036
Coccomyxa_solorinae_HG972987	0.266	0.285		0.004	0.009	0.009	0.012	0.012	0.011	0.011	0.011	0.016	0.015	0.017	0.017	0.017	0.016	0.017	0.017	0.019	0.019	0.02	0.02	0.02	0.021	0.021	0.026	0.026	0.025	0.025	0.031	0.028	0.026	0.026	0.026	0.026
Coccomyxa_solorinae_HG972988	0.27	0.285	0.005		0.009	0.009	0.012	0.012	0.011	0.011	0.011	0.016	0.016	0.017	0.018	0.017	0.016	0.018	0.018	0.019	0.019	0.02	0.02	0.02	0.021	0.021	0.026	0.027	0.026	0.026	0.032	0.028	0.026	0.026	0.026	0.026
Coccomyxa_elongata_HG972980	0.265	0.281	0.033	0.036		0	0.012	0.012	0.011	0.013	0.014	0.017	0.016	0.018	0.018	0.017	0.017	0.018	0.018	0.02	0.02	0.021	0.021	0.022	0.021	0.021	0.026	0.026	0.025	0.025	0.031	0.027	0.026	0.025	0.026	0.026
Coccomyxa_elongata_HG972981	0.265	0.281	0.033	0.036	0		0.012	0.012	0.011	0.013	0.014	0.017	0.016	0.018	0.018	0.017	0.017	0.018	0.018	0.02	0.02	0.021	0.021	0.022	0.021	0.021	0.026	0.026	0.025	0.025	0.031	0.027	0.026	0.025	0.026	0.026
Coccomyxa_simplex_HE586504	0.27	0.289	0.055	0.055	0.055	0.055		0.005	0.012	0.015	0.015	0.016	0.016	0.017	0.016	0.016	0.015	0.017	0.017	0.019	0.019	0.02	0.022	0.023	0.022	0.022	0.025	0.026	0.025	0.025	0.032	0.028	0.025	0.024	0.025	0.025
Coccomyxa_simplex_HG972989	0.27	0.289	0.058	0.058	0.058	0.058	0.008		0.013	0.014	0.014	0.016	0.016	0.017	0.016	0.016	0.016	0.017	0.017	0.018	0.018	0.02	0.022	0.022	0.022	0.022	0.025	0.026	0.025	0.025	0.032	0.028	0.025	0.024	0.025	0.026
Coccomyxa_melkonianii_KU696488	0.281	0.301	0.044	0.044	0.05	0.05	0.061	0.064		0.012	0.012	0.016	0.016	0.017	0.017	0.017	0.017	0.018	0.018	0.02	0.02	0.02	0.021	0.021	0.022	0.022	0.026	0.027	0.026	0.026	0.031	0.028	0.027	0.026	0.027	0.027
Coccomyxa_sp._FN298927_Clade_C	0.292	0.311	0.053	0.053	0.065	0.065	0.081	0.073	0.053		0.012	0.018	0.017	0.018	0.018	0.018	0.018	0.017	0.017	0.019	0.019	0.021	0.021	0.021	0.023	0.023	0.026	0.026	0.026	0.026	0.03	0.028	0.026	0.027	0.027	0.026
Coccomyxa_sp._AB917140_Clade_D	0.281	0.301	0.047	0.053	0.076	0.076	0.081	0.078	0.053	0.055		0.016	0.016	0.015	0.016	0.015	0.017	0.018	0.018	0.018	0.018	0.018	0.02	0.02	0.022	0.022	0.026	0.027	0.026	0.026	0.031	0.028	0.026	0.028	0.027	0.026
Coccomyxa_subellipsoidea_HG972974	0.293	0.304	0.094	0.094	0.103	0.103	0.091	0.093	0.091	0.109	0.094		0.007	0.008	0.008	0.007	0.017	0.017	0.017	0.018	0.018	0.019	0.022	0.021	0.023	0.023	0.028	0.029	0.028	0.028	0.033	0.03	0.029	0.028	0.029	0.029
Coccomyxa_sp._Clade_H	0.275	0.29	0.088	0.088	0.1	0.1	0.093	0.096	0.088	0.103	0.088	0.019		0.008	0.008	0.008	0.017	0.017	0.017	0.018	0.018	0.019	0.021	0.021	0.022	0.022	0.027	0.028	0.026	0.026	0.033	0.028	0.028	0.026	0.027	0.027
Coccomyxa_sp._Clade_E	0.294	0.309	0.103	0.106	0.112	0.112	0.103	0.106	0.104	0.115	0.088	0.024	0.027		0.008	0.007	0.017	0.016	0.016	0.017	0.017	0.018	0.021	0.021	0.022	0.022	0.028	0.029	0.027	0.027	0.034	0.03	0.029	0.027	0.028	0.028
Coccomyxa_subellipsoidea_HG972975	0.29	0.309	0.1	0.103	0.106	0.106	0.091	0.094	0.098	0.109	0.088	0.024	0.027	0.024		0.002	0.017	0.016	0.016	0.018	0.018	0.018	0.022	0.021	0.023	0.023	0.027	0.028	0.027	0.027	0.032	0.029	0.028	0.026	0.028	0.028
Coccomyxa_subellipsoidea_HG972976	0.287	0.306	0.097	0.101	0.103	0.103	0.088	0.091	0.095	0.106	0.085	0.022	0.024	0.022	0.003		0.017	0.016	0.016	0.017	0.017	0.018	0.022	0.021	0.022	0.022	0.028	0.029	0.027	0.027	0.033	0.029	0.028	0.027	0.028	0.028
Coccomyxa_vinatzeri_HG972994	0.289	0.314	0.088	0.088	0.1	0.1	0.085	0.088	0.097	0.109	0.1	0.103	0.1	0.097	0.097	0.1		0.015	0.015	0.019	0.019	0.02	0.022	0.021	0.021	0.021	0.027	0.028	0.027	0.027	0.031	0.029	0.027	0.026	0.028	0.027
Coccomyxa_galuniae_HG972996	0.273	0.305	0.107	0.11	0.107	0.107	0.107	0.107	0.11	0.11	0.113	0.106	0.103	0.097	0.094	0.091	0.077		0	0.018	0.018	0.02	0.022	0.022	0.021	0.021	0.026	0.026	0.025	0.025	0.031	0.027	0.025	0.026	0.026	0.026
Coccomyxa_galuniae_FN298928	0.273	0.305	0.107	0.11	0.107	0.107	0.107	0.107	0.11	0.11	0.113	0.106	0.103	0.097	0.094	0.091	0.077	0		0.018	0.018	0.02	0.022	0.022	0.021	0.021	0.026	0.026	0.025	0.025	0.031	0.027	0.025	0.026	0.026	0.026
Coccomyxa_sp._HE586550_Clade_I	0.293	0.326	0.123	0.126	0.152	0.152	0.138	0.129	0.137	0.135	0.11	0.122	0.116	0.104	0.119	0.116	0.132	0.123	0.123		0	0.007	0.014	0.013	0.014	0.014	0.029	0.029	0.028	0.028	0.033	0.029	0.029	0.029	0.028	0.029
Coccomyxa_sp._HE586515_Clade_I	0.293	0.326	0.123	0.126	0.152	0.152	0.138	0.129	0.137	0.135	0.11	0.122	0.116	0.104	0.119	0.116	0.132	0.123	0.123	0		0.007	0.014	0.013	0.014	0.014	0.029	0.029	0.028	0.028	0.033	0.029	0.029	0.029	0.028	0.029
Coccomyxa_onubensis_HE617183	0.295	0.322	0.133	0.136	0.16	0.16	0.149	0.14	0.14	0.149	0.117	0.133	0.127	0.114	0.127	0.124	0.139	0.134	0.134	0.016	0.016		0.013	0.013	0.013	0.013	0.029	0.029	0.028	0.028	0.033	0.029	0.029	0.029	0.028	0.029
Coccomyxa_polymorpha_HG972979	0.28	0.308	0.143	0.143	0.163	0.163	0.172	0.162	0.151	0.15	0.134	0.169	0.157	0.16	0.167	0.163	0.172	0.16	0.16	0.07	0.07	0.07		0.004	0.014	0.014	0.027	0.027	0.026	0.026	0.034	0.028	0.027	0.027	0.027	0.027
Coccomyxa_polymorpha_HE586514	0.276	0.304	0.143	0.143	0.167	0.167	0.172	0.162	0.151	0.15	0.134	0.163	0.15	0.153	0.16	0.157	0.165	0.16	0.16	0.064	0.064	0.064	0.005		0.013	0.013	0.027	0.027	0.027	0.027	0.034	0.028	0.027	0.027	0.027	0.027
Coccomyxa_antinabiotis_FR850476	0.291	0.332	0.15	0.154	0.16	0.16	0.167	0.164	0.157	0.171	0.157	0.166	0.16	0.156	0.163	0.16	0.15	0.15	0.15	0.067	0.067	0.064	0.07	0.064		0	0.03	0.03	0.028	0.028	0.035	0.029	0.029	0.03	0.029	0.029
Coccomyxa_antinabiotis_HE586516	0.291	0.332	0.15	0.154	0.16	0.16	0.167	0.164	0.157	0.171	0.157	0.166	0.16	0.156	0.163	0.16	0.15	0.15	0.15	0.067	0.067	0.064	0.07	0.064	0		0.03	0.03	0.028	0.028	0.035	0.029	0.029	0.03	0.029	0.029
Coccomyxa_viridis_HG973001	0.299	0.306	0.196	0.2	0.199	0.199	0.198	0.198	0.195	0.193	0.196	0.231	0.211	0.225	0.218	0.222	0.219	0.205	0.205	0.238	0.238	0.238	0.215	0.215	0.247	0.247		0.005	0.007	0.007	0.032	0.014	0.009	0.015	0.011	0.009
Coccomyxa_viridis_HG973002	0.303	0.319	0.204	0.207	0.207	0.207	0.209	0.206	0.202	0.2	0.203	0.243	0.222	0.236	0.23	0.233	0.223	0.208	0.208	0.246	0.246	0.247	0.223	0.223	0.251	0.251	0.008		0.008	0.008	0.032	0.015	0.01	0.016	0.011	0.01
Coccomyxa_sp._HG973004_Clade_N	0.291	0.307	0.199	0.203	0.195	0.195	0.201	0.201	0.201	0.203	0.202	0.227	0.207	0.22	0.214	0.217	0.216	0.19	0.19	0.237	0.237	0.238	0.211	0.219	0.238	0.238	0.022	0.024		0	0.033	0.014	0.008	0.014	0.009	0.008
Coccomyxa_sp._HG973007_Clade_N	0.291	0.307	0.199	0.203	0.195	0.195	0.201	0.201	0.201	0.203	0.202	0.227	0.207	0.22	0.214	0.217	0.216	0.19	0.19	0.237	0.237	0.238	0.211	0.219	0.238	0.238	0.022	0.024	0		0.033	0.014	0.008	0.014	0.009	0.008
Coccomyxa_dispar_HG972998	0.282	0.348	0.253	0.257	0.253	0.253	0.268	0.26	0.254	0.245	0.257	0.292	0.288	0.29	0.274	0.278	0.253	0.253	0.253	0.277	0.277	0.277	0.284	0.284	0.296	0.296	0.261	0.261	0.26	0.26		0.032	0.032	0.033	0.032	0.033
Coccomyxa_HE586508_Clade_KL	0.298	0.326	0.22	0.213	0.217	0.217	0.22	0.22	0.225	0.217	0.228	0.25	0.229	0.256	0.245	0.248	0.236	0.222	0.222	0.253	0.253	0.254	0.246	0.246	0.256	0.256	0.083	0.086	0.086	0.086	0.261		0.014	0.016	0.014	0.014
Coccomyxa_sp._HE586519_Clade_M	0.296	0.314	0.203	0.207	0.206	0.206	0.202	0.202	0.212	0.196	0.213	0.245	0.225	0.239	0.232	0.236	0.216	0.19	0.19	0.245	0.245	0.245	0.219	0.226	0.246	0.246	0.036	0.038	0.03	0.03	0.253	0.074		0.015	0.01	0.008
Coccomyxa_antarctica_MF465900	0.268	0.29	0.207	0.208	0.193	0.193	0.195	0.195	0.207	0.219	0.229	0.232	0.215	0.225	0.218	0.221	0.207	0.204	0.204	0.246	0.246	0.251	0.221	0.224	0.255	0.255	0.077	0.08	0.067	0.067	0.258	0.101	0.082		0.013	0.013
Coccomyxa_greatwallensis_sp._nov._FACHB_2139	0.3	0.31	0.207	0.211	0.203	0.203	0.201	0.201	0.205	0.204	0.207	0.238	0.221	0.225	0.225	0.228	0.225	0.211	0.211	0.23	0.23	0.227	0.209	0.216	0.235	0.235	0.039	0.041	0.03	0.03	0.253	0.082	0.038	0.062		0.007
Coccomyxa_avernensis_HG973000	0.3	0.306	0.207	0.21	0.21	0.21	0.206	0.206	0.209	0.2	0.21	0.242	0.222	0.236	0.229	0.233	0.215	0.201	0.201	0.241	0.241	0.242	0.215	0.222	0.246	0.246	0.03	0.033	0.022	0.022	0.26	0.076	0.024	0.064	0.022
Table. Estimates of Evolutionary Divergence between Sequences
The number of base substitutions per site from between sequences are shown. Standard error estimate(s) are shown above the diagonal. Analyses were conducted using the Maximum Composite Likelihood model [1]. The analysis involved 36 nucleotide sequences. Codon positions included were 1st+2nd+3rd+Noncoding. All positions containing gaps and missing data were eliminated. There were a total of 376 po…
1. Tamura K.	Nei M.	and Kumar S. (2004). Prospects for inferring very large phylogenies by using the neighbor-joining method. Proceedings of the National Academy of Sciences (USA) 101:11030-11035.
2. Kumar S.	Stecher G.	and Tamura K. (2016). MEGA7: Molecular Evolutionary Genetics Analysis version 7.0 for bigger datasets.Molecular Biology and Evolution 33:1870-1874.
Disclaimer: Although utmost care has been taken to ensure the correctness of the caption	the caption text is provided "as is" without any warranty of any kind. Authors advise the user to carefully check the caption prior to its use for any purpose and report any errors or problems to the authors immediately (www.megasoftware.net). In no event shall the authors and their employers be liable for any damages	including but not limited to special	consequential	or other damages. Authors specifically disclaim all other warranties expressed or implied	including but not limited to the determination of suitability of this caption text for a specific purpose	use	or application.
